# Supplementary material for: Palladium-catalysed oxidative cross-esterification between two alcohols
Source: Royal Society of Chemistry journal article supplement (doi:10.1039/c5ob00677e), 2015-01-01

# Supporting Information

## **Palladium-catalysed oxidative esterification between two alcohols**

Jianhui Xia,<sup>a</sup> Ailong Shao<sup>a</sup>, Shan Tang,<sup>b</sup> Xinlong Gao,<sup>b</sup> Meng Gao<sup>a,\*</sup> and Aiwen Lei<sup>a,b,\*</sup>

<sup>a</sup>*National Research Center for Carbohydrate Synthesis, Jiangxi Normal University, Nanchang, Jiangxi 330022, P. R. China*

<sup>b</sup>*College of Chemistry and Molecular Sciences, the Institute for Advanced Studies (IAS), Wuhan University, Wuhan, Hubei 430072, P. R. China.*

*E-mail: drmenggao@163.com; aiwenlei@whu.edu.cn*

|                                              |           |
|----------------------------------------------|-----------|
| <b>General information.....</b>              | <b>S2</b> |
| <b>General procedure.....</b>                | <b>S2</b> |
| <b>Detail descriptions for products.....</b> | <b>S3</b> |
| <b>References.....</b>                       | <b>S7</b> |
| <b>Copies of product NMR Spectra.....</b>    | <b>S8</b> |

## General information

All reactions were isolated from moisture and oxygen by a nitrogen atmosphere with a balloon fitted on a Schlenk tube. All glassware was oven dried at 110 °C for hours and cooled down under vacuum. THF was purified by distillation with sodium. Unless otherwise noted, materials were obtained from commercial suppliers and used without further purification. Thin layer chromatography (TLC) employed glass 0.25 mm silica gel plates. Flash chromatography columns were packed with 200-300 mesh silica gel in petroleum (bp. 60-90 °C). Gas chromatographic analyses were performed on Varian GC 2000 gas chromatography instrument with a FID detector and naphthalene was added as internal standard.  $^1\text{H}$  and  $^{13}\text{C}$  NMR data were recorded with Bruker Advance III (400 MHz) spectrometers with tetramethylsilane as an internal standard. All chemical shifts ( $\delta$ ) are reported in ppm and coupling constants ( $J$ ) in Hz. All chemical shifts are reported relative to tetramethylsilane and d-solvent peaks (77.00 ppm, chloroform), respectively.

## General procedure

$\text{PdCl}_2(\text{PPh}_3)_2$  (17.5 mg, 0.025 mmol) and  $\text{K}_2\text{CO}_3$  (139.0 mg, 1.0 mmol) were placed in a Schlenk tube, which was filled with nitrogen by using standard Schlenk techniques. THF (2.0 mL), benzyl chloride (126.6 mg, 1.0 mmol), benzyl alcohol **1** (0.50 mmol) and aliphatic alcohol **2** (5.0 mmol) were consequently added to the reaction tube. The reaction mixture was stirred at 65-70 °C for 20 h. Then the suspension solution was extracted by ethyl acetate (3 x 5 mL), and the resulting mixture was quenched with water. The organic layers were combined, and dried over sodium sulfate. The pure product was obtained by flash column chromatography on silica gel (petroleum : ethyl acetate = 50:1)

## Detail descriptions for products

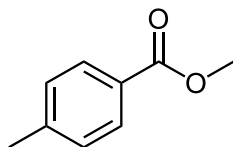

**Methyl 4-methylbenzoate (3a):**<sup>1</sup> pale yellow oil was obtained in 99% isolated yield. <sup>1</sup>H NMR (400 MHz, CDCl<sub>3</sub>)  $\delta$ <sub>H</sub> 7.92 (d, *J* = 8.2 Hz, 2H), 7.22 (d, *J* = 8.2 Hz, 2H), 3.89 (s, 3H), 2.39 (s, 3H). <sup>13</sup>C NMR (101 MHz, CDCl<sub>3</sub>)  $\delta$ <sub>C</sub> 167.07, 143.44, 129.50, 128.97, 127.33, 51.83, 21.54.

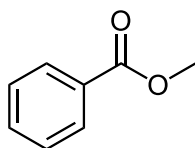

**Methyl benzoate (3b):**<sup>1</sup> pale yellow oil was obtained in 99% isolated yield. <sup>1</sup>H NMR (400 MHz, CDCl<sub>3</sub>)  $\delta$ <sub>H</sub> 8.04 (dd, *J* = 8.3, 1.3 Hz, 2H), 7.53 (d, *J* = 7.5 Hz, 1H), 7.43 (t, *J* = 7.7 Hz, 2H), 3.91 (s, 3H). <sup>13</sup>C NMR (101 MHz, CDCl<sub>3</sub>)  $\delta$ <sub>C</sub> 167.09, 132.88, 130.11, 129.67, 129.53, 128.56, 128.32, 52.08.

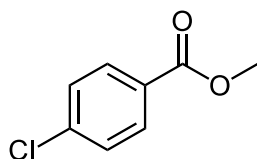

**Methyl 4-chlorobenzoate (3c):**<sup>2</sup> pale yellow oil was obtained in 98% isolated yield. <sup>1</sup>H NMR (400 MHz, CDCl<sub>3</sub>)  $\delta$ <sub>H</sub> 7.96 (d, *J* = 8.7 Hz, 2H), 7.40 (d, *J* = 8.7 Hz, 2H), 3.91 (s, 3H). <sup>13</sup>C NMR (101 MHz, CDCl<sub>3</sub>)  $\delta$ <sub>C</sub> 166.11, 139.27, 130.88, 128.62, 128.49, 52.18.

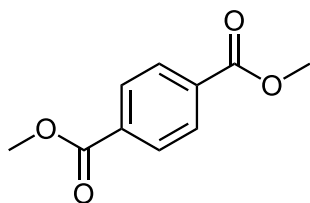

**Dimethyl terephthalate (3d):**<sup>2</sup> pale yellow oil was obtained in 84% isolated yield. <sup>1</sup>H NMR (400 MHz, CDCl<sub>3</sub>)  $\delta$ <sub>H</sub> 8.09 (s, 4H), 3.94 (s, 6H). <sup>13</sup>C NMR (101 MHz, CDCl<sub>3</sub>)  $\delta$ <sub>C</sub> 166.21, 133.82, 129.48, 77.32, 77.00, 76.68, 52.39.

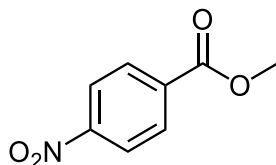

**Methyl 4-nitrobenzoate (3e):**<sup>1</sup> pale yellow oil was obtained in 50 % isolated yield. <sup>1</sup>H NMR (400

MHz, CDCl<sub>3</sub>)  $\delta_{\text{H}}$  8.30 (d,  $J = 8.9$  Hz, 2H), 8.22 (d,  $J = 8.9$  Hz, 2H), 3.99 (s, 3H). <sup>13</sup>C NMR (101 MHz, CDCl<sub>3</sub>)  $\delta_{\text{C}}$  165.16, 150.54, 135.48, 130.69, 123.53, 52.81.

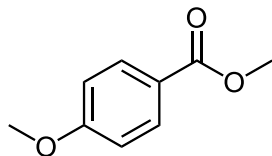

**Methyl 4-methoxybenzoate (3f):**<sup>1</sup> pale yellow oil was obtained in 98% isolated yield. <sup>1</sup>H NMR (400 MHz, CDCl<sub>3</sub>)  $\delta_{\text{H}}$  8.00 (d,  $J = 8.9$  Hz, 2H), 6.92 (d,  $J = 8.9$  Hz, 2H), 3.89 (s, 3H), 3.86 (s, 3H). <sup>13</sup>C NMR (101 MHz, CDCl<sub>3</sub>)  $\delta_{\text{C}}$  166.85, 163.28, 131.55, 122.55, 113.56, 55.38, 51.84.

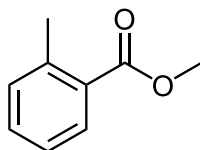

**Methyl 2-methylbenzoate (3g):**<sup>2</sup> pale yellow oil was obtained in 86% isolated yield. <sup>1</sup>H NMR (400 MHz, CDCl<sub>3</sub>)  $\delta_{\text{H}}$  7.91 (d,  $J = 8.4$  Hz, 1H), 7.39 (t,  $J = 7.5$  Hz, 1H), 7.24 (d,  $J = 7.7$  Hz, 2H), 3.88 (s, 3H), 2.60 (s, 3H). <sup>13</sup>C NMR (101 MHz, CDCl<sub>3</sub>)  $\delta_{\text{C}}$  168.00, 140.11, 131.89, 131.61, 130.50, 129.48, 125.62, 51.73, 21.67.

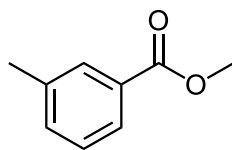

**Methyl 3-methylbenzoate (3h):**<sup>1</sup> pale yellow oil was obtained in 98% isolated yield. <sup>1</sup>H NMR (400 MHz, CDCl<sub>3</sub>)  $\delta_{\text{H}}$  7.90 – 7.80 (m, 2H), 7.40 – 7.29 (m, 2H), 3.91 (s, 3H), 2.40 (s, 3H). <sup>13</sup>C NMR (101 MHz, CDCl<sub>3</sub>)  $\delta_{\text{C}}$  167.24, 138.09, 133.62, 130.07, 128.21, 126.66, 51.99, 21.21.

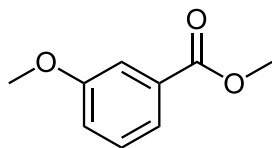

**Methyl 3-methoxybenzoate (3i):**<sup>1</sup> pale yellow oil was obtained in 95% isolated yield. <sup>1</sup>H NMR (400 MHz, CDCl<sub>3</sub>)  $\delta_{\text{H}}$  7.65 – 7.45 (m, 2H), 7.24 (t,  $J = 8.0$  Hz, 1H), 7.01 (d,  $J = 2.6$  Hz, 1H), 3.82 (s, 3H), 3.75 (s, 3H). <sup>13</sup>C NMR (101 MHz, CDCl<sub>3</sub>)  $\delta_{\text{C}}$  166.84, 159.43, 131.32, 129.27, 121.85, 119.36, 113.84, 55.28, 52.05.

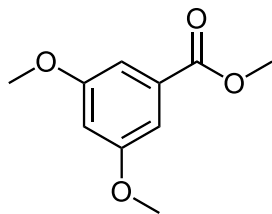

**Methyl 3,5-dimethoxybenzoate (3j):**<sup>3</sup> pale yellow oil was obtained in 98% isolated yield. <sup>1</sup>H NMR (400 MHz, CDCl<sub>3</sub>)  $\delta$  <sub>H</sub> 7.18 (d, *J* = 2.3 Hz, 2H), 6.64 (t, *J* = 2.3 Hz, 1H), 3.90 (s, 3H), 3.82 (s, 6H). <sup>13</sup>C NMR (101 MHz, CDCl<sub>3</sub>)  $\delta$  <sub>C</sub> 166.79, 160.56, 131.92, 107.03, 105.69, 55.49, 52.18.

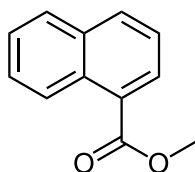

**Methyl 1-naphthoate (3k):**<sup>3</sup> pale yellow oil was obtained in 91% isolated yield. <sup>1</sup>H NMR (400 MHz, CDCl<sub>3</sub>)  $\delta$  <sub>H</sub> 8.91 (d, *J* = 8.7 Hz, 1H), 8.17 (dd, *J* = 7.3, 1.1 Hz, 1H), 7.99 (d, *J* = 8.2 Hz, 1H), 7.85 (d, *J* = 8.1 Hz, 1H), 7.60 (t, *J* = 8.4 Hz, 1H), 7.54 – 7.42 (m, 2H), 3.98 (s, 3H). <sup>13</sup>C NMR (101 MHz, CDCl<sub>3</sub>)  $\delta$  <sub>C</sub> 167.93, 133.74, 133.29, 131.24, 130.15, 128.46, 127.68, 126.95, 126.12, 125.73, 124.39, 52.06.

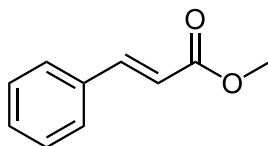

**Methyl cinnamate (3l):**<sup>1</sup> pale yellow oil was obtained in 78% isolated yield. <sup>1</sup>H NMR (400 MHz, CDCl<sub>3</sub>)  $\delta$  <sub>H</sub> 7.70 (d, *J* = 16.0 Hz, 1H), 7.56 – 7.48 (m, 2H), 7.42 – 7.34 (m, 3H), 6.44 (d, *J* = 16.0 Hz, 1H), 3.80 (s, 3H). <sup>13</sup>C NMR (101 MHz, CDCl<sub>3</sub>)  $\delta$  <sub>C</sub> 167.36, 144.82, 134.36, 130.23, 128.83, 128.01, 117.78, 51.62.

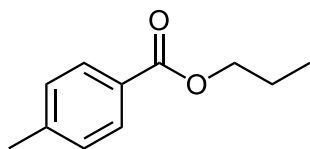

**Propyl 4-methylbenzoate (3m):**<sup>4</sup> pale yellow oil was obtained in 76% isolated yield. <sup>1</sup>H NMR (400 MHz, CDCl<sub>3</sub>)  $\delta$  <sub>H</sub> 7.97 (d, *J* = 8.2 Hz, 2H), 7.26 (d, *J* = 8.0 Hz, 2H), 4.29 (t, *J* = 6.7 Hz, 2H), 2.43 (s, 3H), 1.81 (m, *J* = 14.2, 7.0 Hz, 2H), 1.05 (t, *J* = 7.4 Hz, 3H). <sup>13</sup>C NMR (101 MHz, CDCl<sub>3</sub>)  $\delta$  <sub>C</sub> 166.69, 143.33, 129.50, 128.96, 127.74, 66.28, 22.09, 21.57, 10.47.

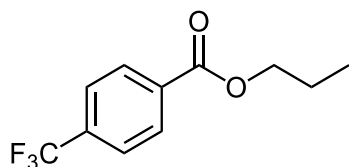

**Propyl 4-(trifluoromethyl)benzoate (3n):**<sup>5</sup> pale yellow oil was obtained in 60% isolated yield. <sup>1</sup>H NMR (400 MHz, CDCl<sub>3</sub>)  $\delta$  <sub>H</sub> 8.16 (d, *J* = 8.1 Hz, 2H), 7.70 (d, *J* = 8.2 Hz, 2H), 4.32 (t, *J* = 6.7 Hz, 2H), 1.89 – 1.74 (m, 2H), 1.04 (t, *J* = 7.4 Hz, 3H). <sup>13</sup>C NMR (101 MHz, CDCl<sub>3</sub>)  $\delta$  <sub>C</sub> 186.29, 165.42, 134.78, 134.46, 134.14, 133.81, 133.71, 129.91, 128.30, 127.72, 125.39, 125.36, 125.32, 125.28, 125.00, 122.30, 119.59, 67.07, 22.03, 10.43.

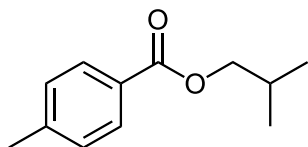

**isobutyl 4-Methylbenzoate (3o):**<sup>6</sup> pale yellow oil was obtained in 68% isolated yield. <sup>1</sup>H NMR (400 MHz, CDCl<sub>3</sub>)  $\delta$  <sub>H</sub> 7.94 (d, *J* = 8.2 Hz, 2H), 7.22 (d, *J* = 8.0 Hz, 2H), 4.09 (d, *J* = 6.6 Hz, 2H), 2.39 (s, 3H), 2.20 – 1.95 (m, 1H), 1.01 (d, *J* = 6.7 Hz, 6H). <sup>13</sup>C NMR (101 MHz, CDCl<sub>3</sub>)  $\delta$  <sub>C</sub> 166.59, 143.32, 129.47, 128.95, 127.70, 70.72, 27.84, 21.54, 19.12.

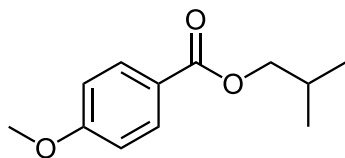

**Isobutyl 4-Methoxybenzoate (3p):**<sup>7</sup> pale yellow oil was obtained in 70% isolated yield. <sup>1</sup>H NMR (400 MHz, CDCl<sub>3</sub>)  $\delta$  <sub>H</sub> 8.01 (d, *J* = 8.9 Hz, 2H), 6.91 (d, *J* = 8.9 Hz, 2H), 4.07 (d, *J* = 6.6 Hz, 2H), 3.84 (s, 3H), 2.20 – 1.95 (m, 1H), 1.01 (d, *J* = 6.7 Hz, 6H). <sup>13</sup>C NMR (101 MHz, CDCl<sub>3</sub>)  $\delta$  <sub>C</sub> 166.27, 163.16, 131.42, 122.85, 113.46, 70.60, 55.28, 27.84, 19.12.

## References

1. C. Liu, J. Wang, L. Meng, Y. Deng, Y. Li and A. Lei, *Angew. Chem. Int. Ed.*, 2011, **50**, 5144-5148.
2. R. V. Jagadeesh, H. Junge, M.-M. Pohl, J. Radnik, A. Brückner and M. Beller, *J. Am. Chem. Soc.*, 2013, **135**, 10776-10782.
3. Y. Zhu, H. Yan, L. Lu, D. Liu, G. Rong and J. Mao, *J. Org. Chem.*, 2013, **78**, 9898-9905.
4. A. N. Rao, K. Ganesan and C. K. Shinde, *Synthetic. Commun.*, 2012, **42**, 2299-2308.
5. Y. Kita, Y. Nishii, A. Onoue and K. Mashima, *Adv. Synth. Catal.*, 2013, **355**, 3391-3395.
6. X. Chai, J. Zhang, H. Hu, S. Yu, Q. Sun, Z. Dan, Y. Jiang and Q. Wu, *Eur. J. Med. Chem.*, 2009, **44**, 1913-1920.
7. J. I. Lee, *B. Kor. Chem. Soc.*, 2011, **32**, 1765-1768.

## Copies of product NMR Spectra

3a

$^1\text{H}$  NMR

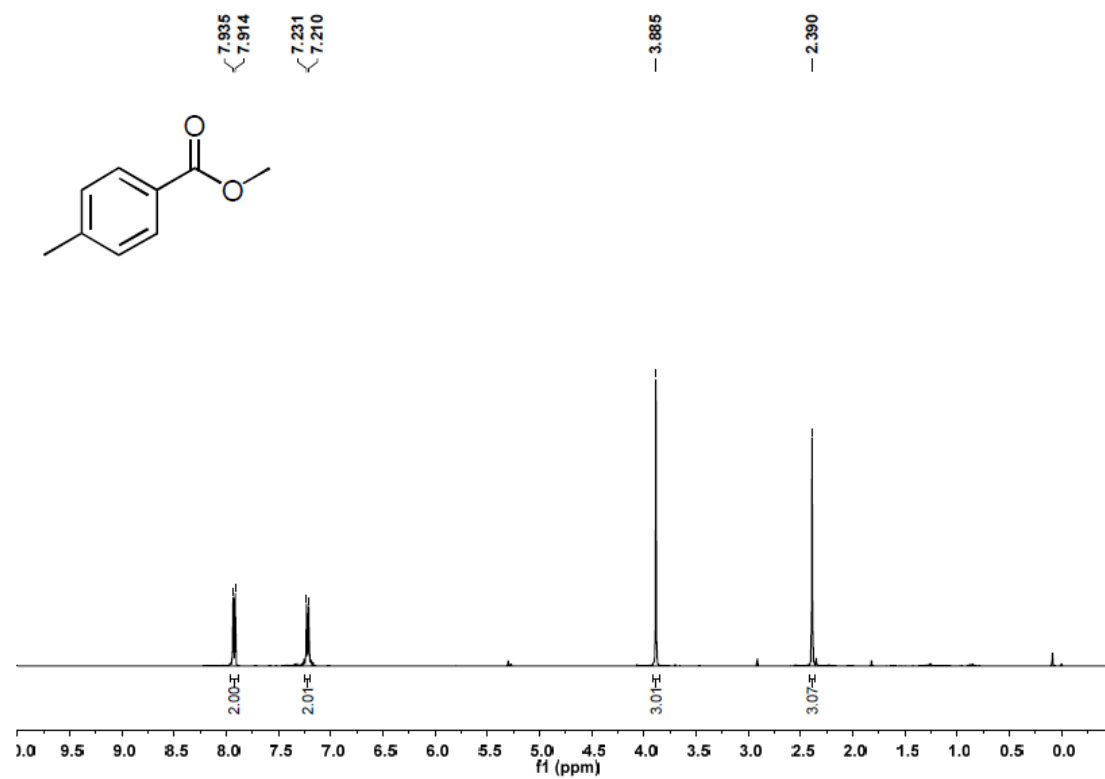

$^{13}\text{C}$  NMR

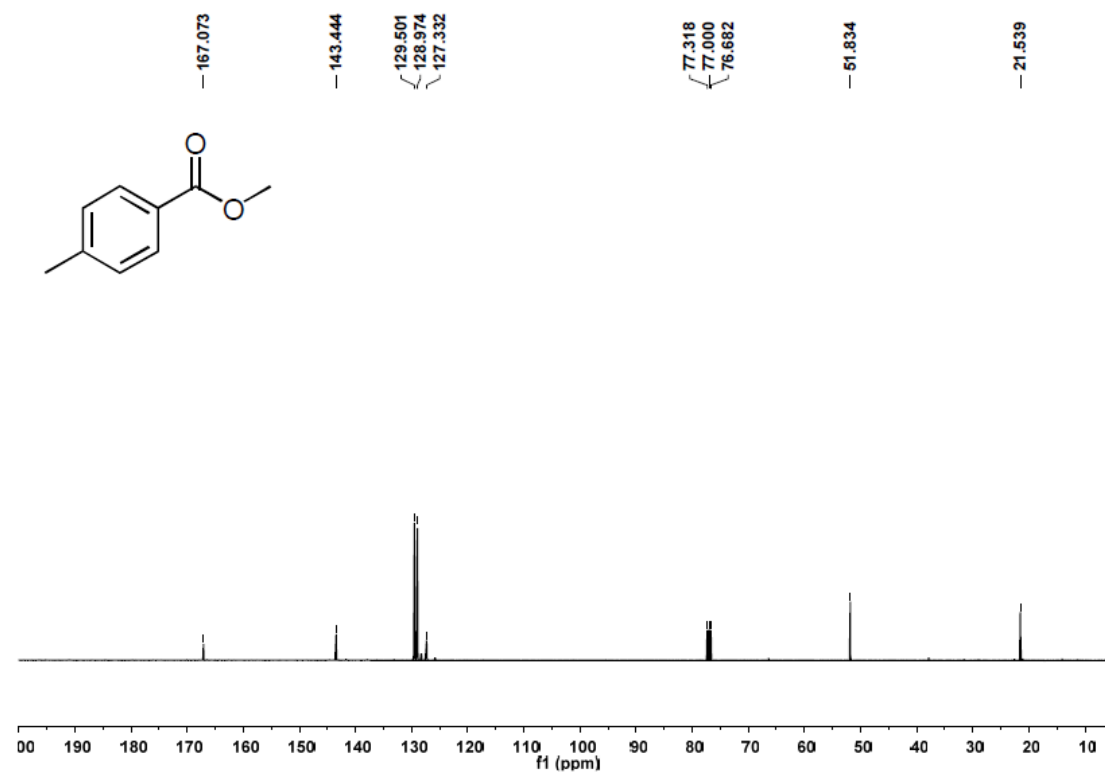

3b

$^1\text{H}$  NMR

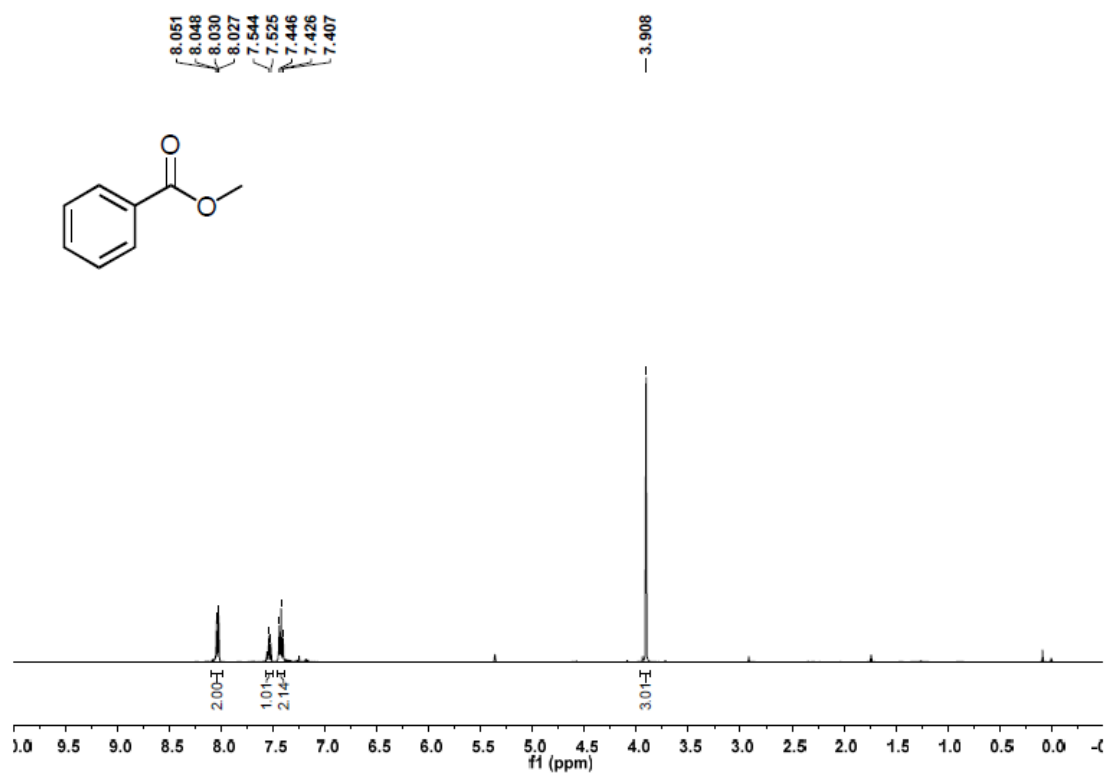

$^{13}\text{C}$  NMR

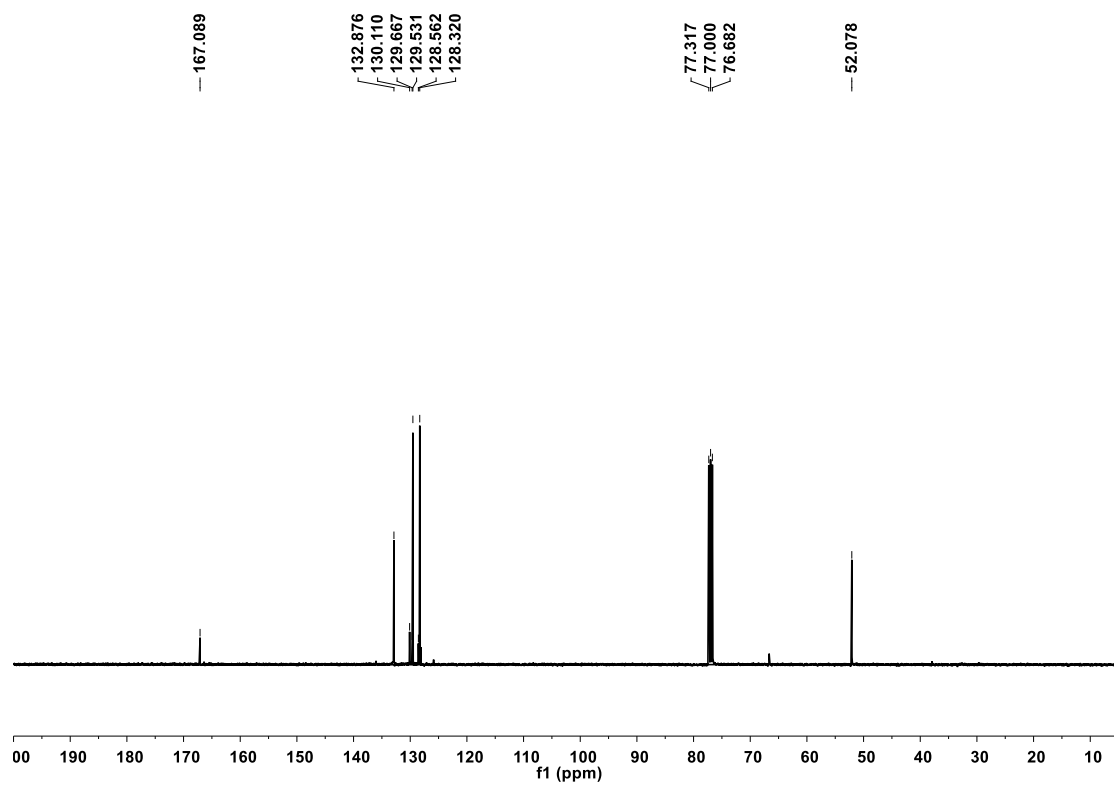

3c

<sup>1</sup>H NMR

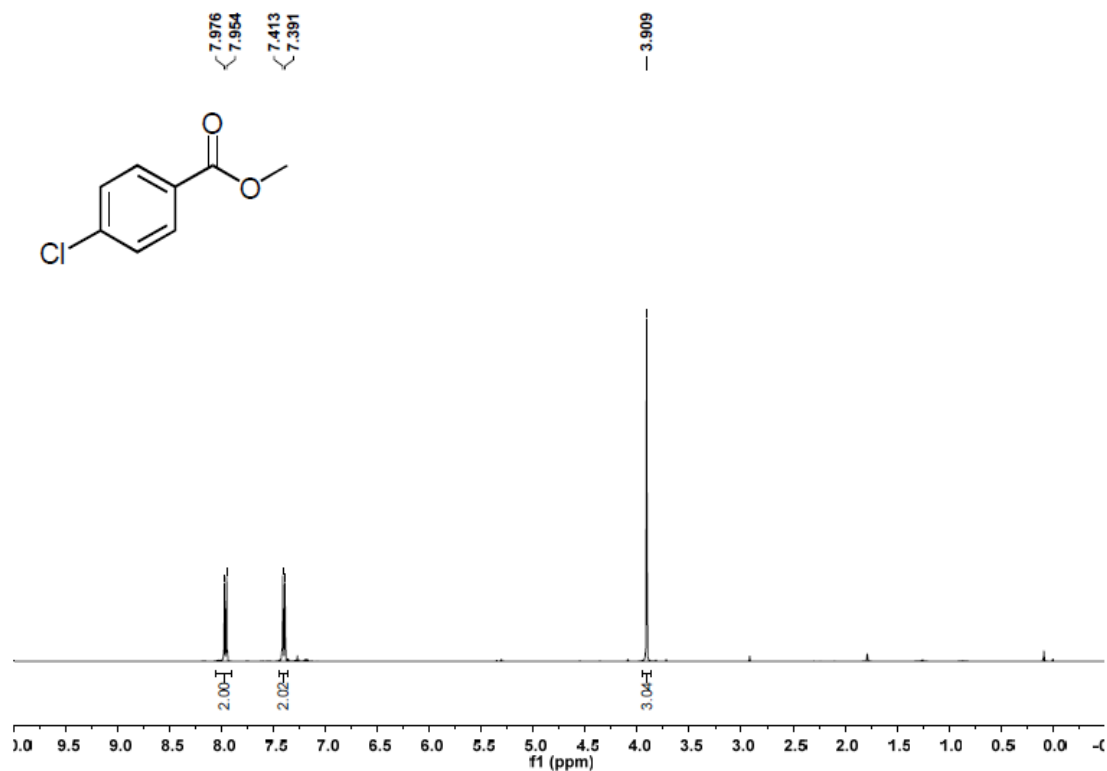

<sup>13</sup>C NMR

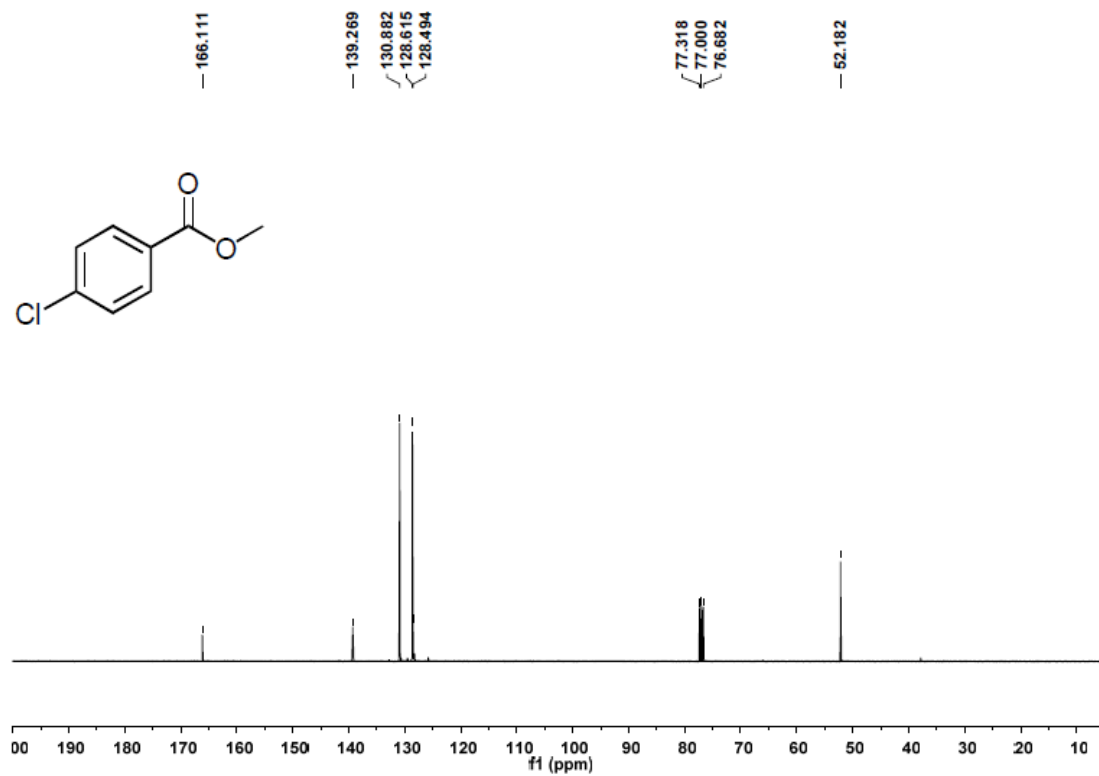

3d

$^1\text{H}$  NMR

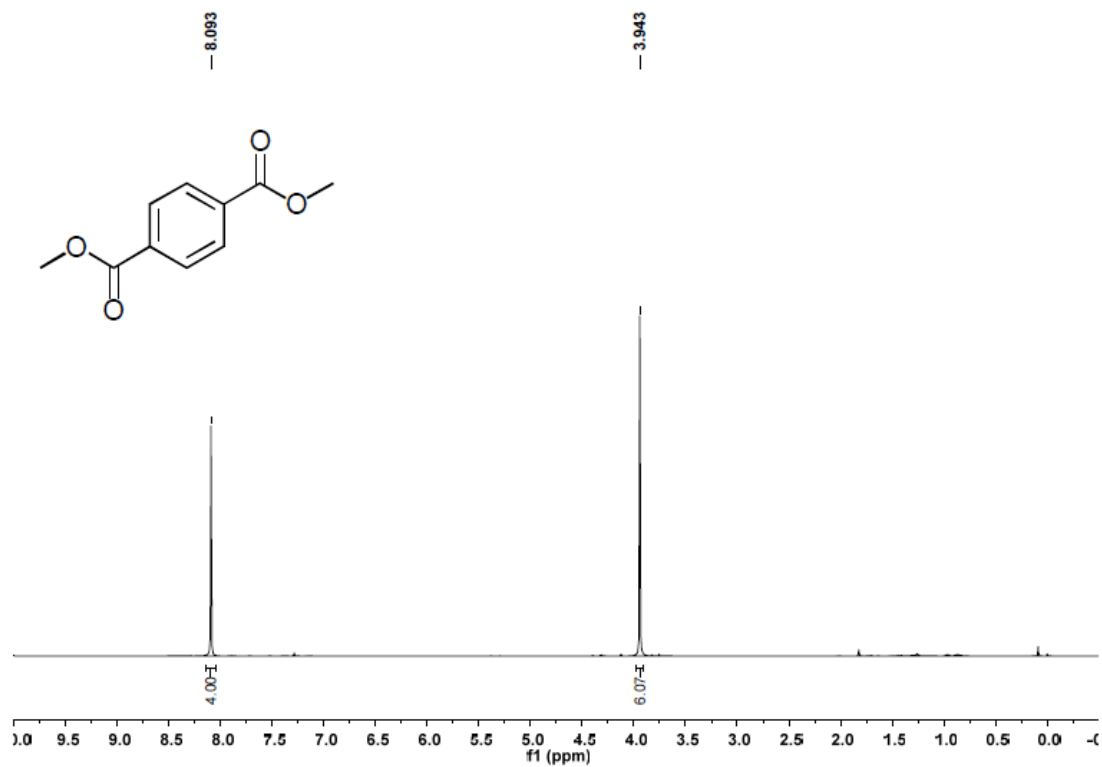

$^{13}\text{C}$  NMR

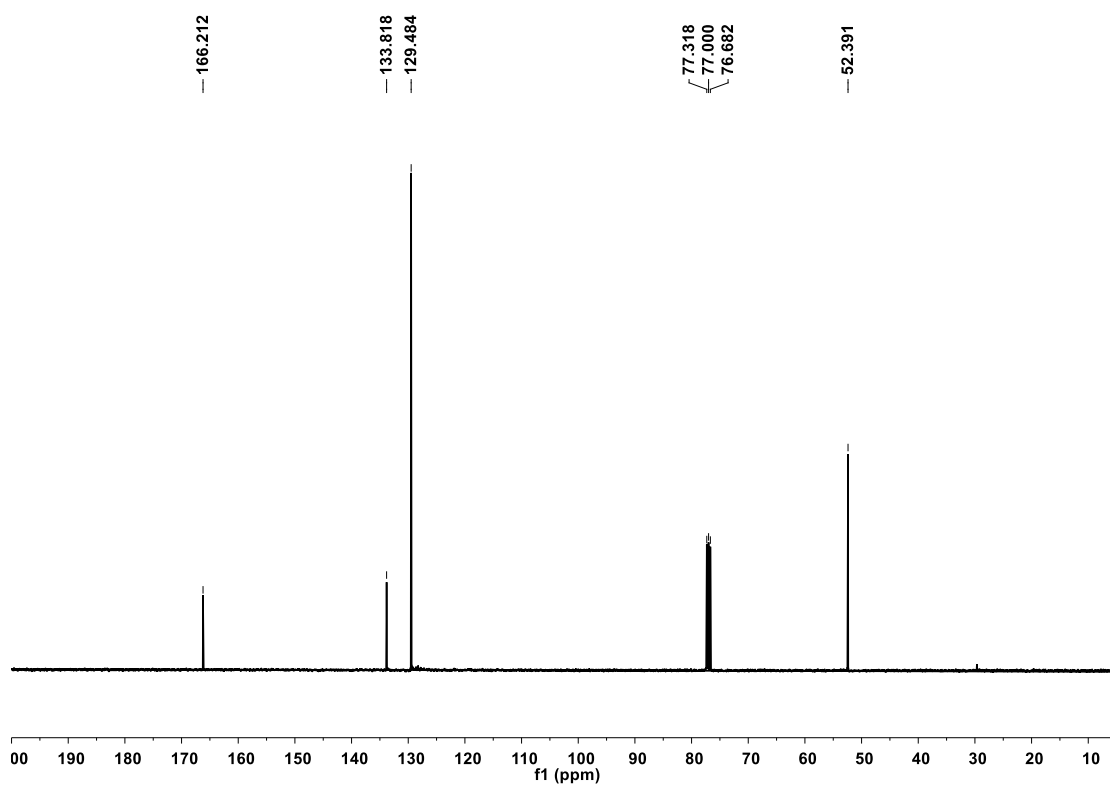

3e

$^1\text{H}$  NMR

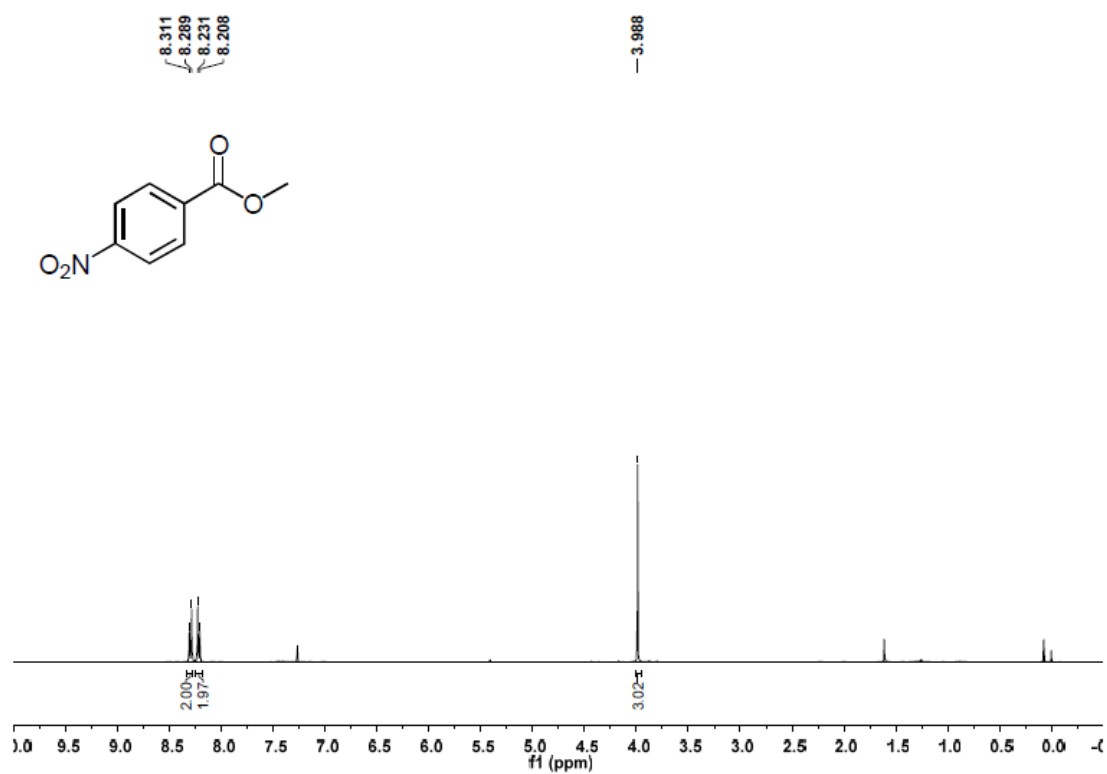

$^{13}\text{C}$  NMR

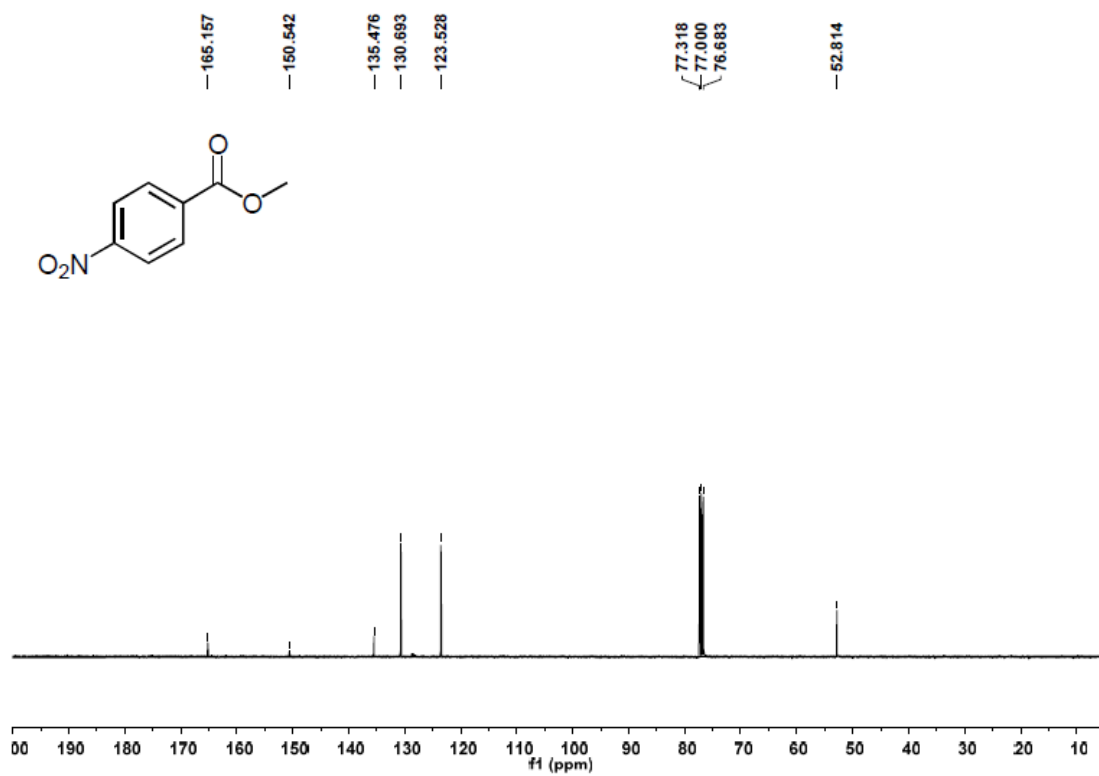

# 3f

## <sup>1</sup>H NMR

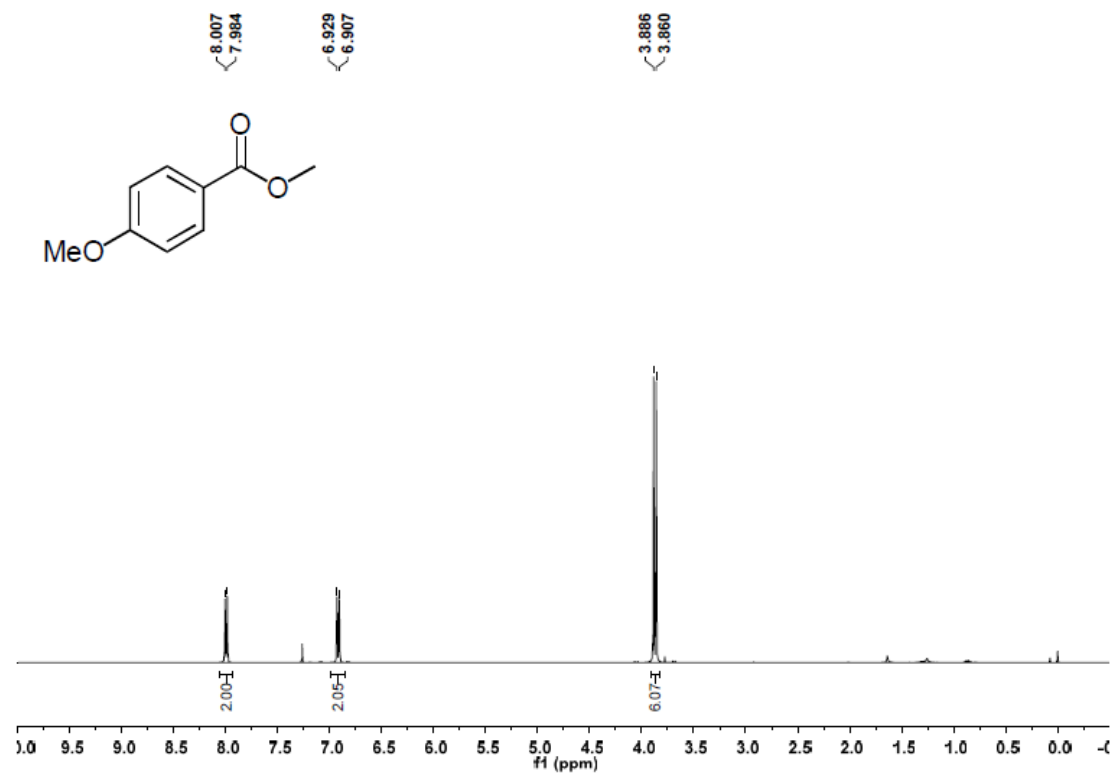

## <sup>13</sup>C NMR

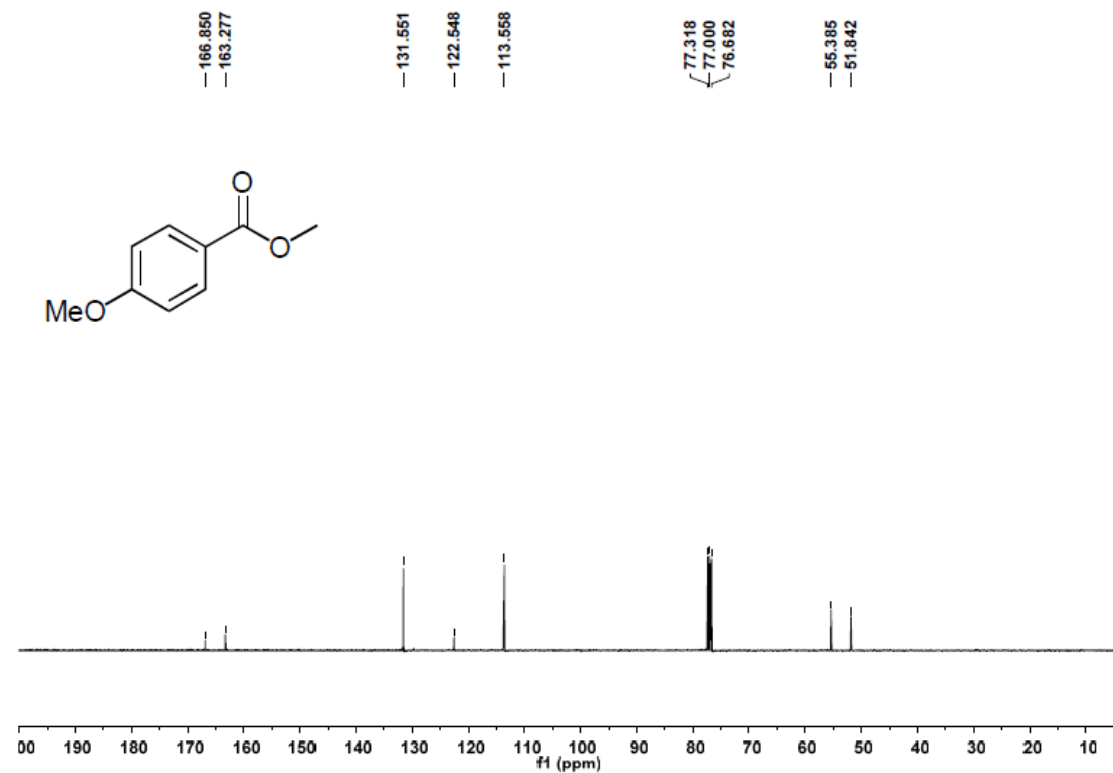

3g

<sup>1</sup>H NMR

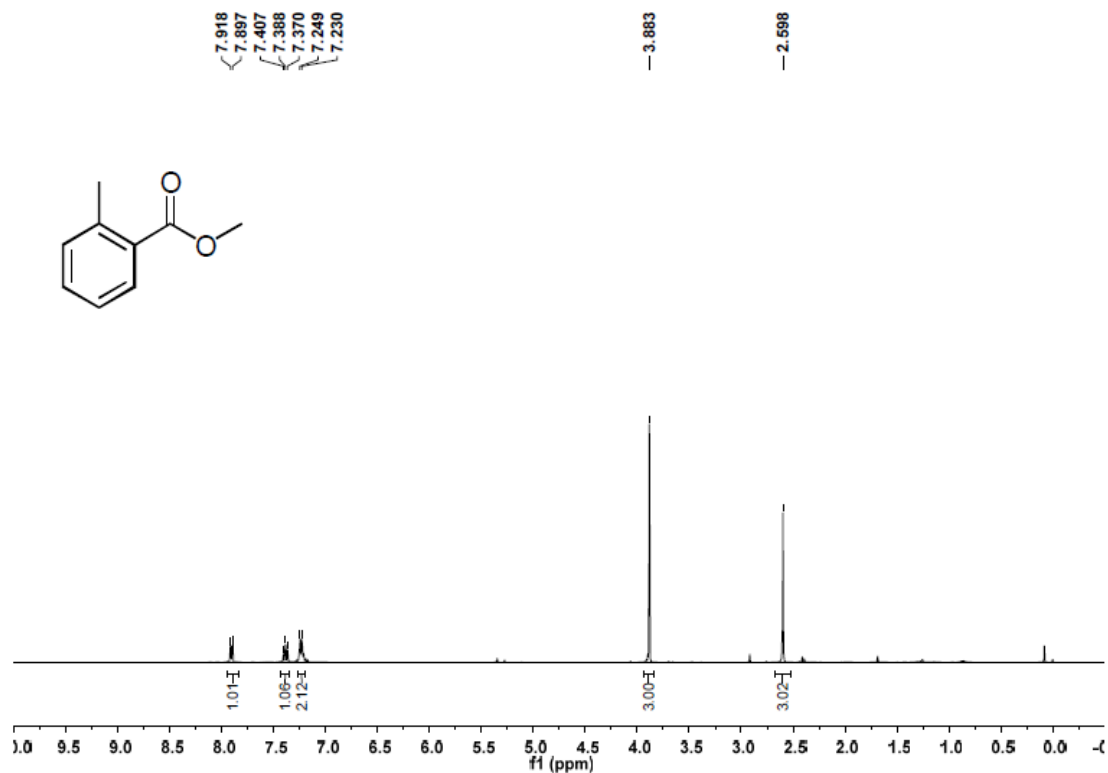

<sup>13</sup>C NMR

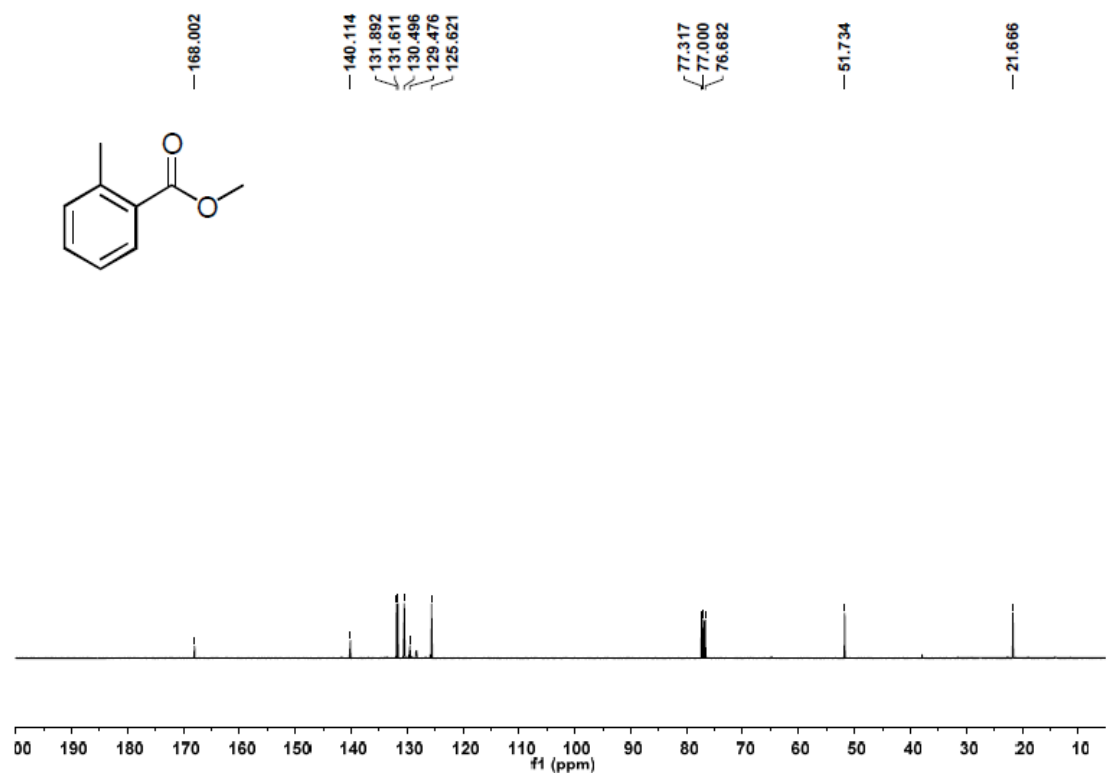

### 3h

<sup>1</sup>H NMR

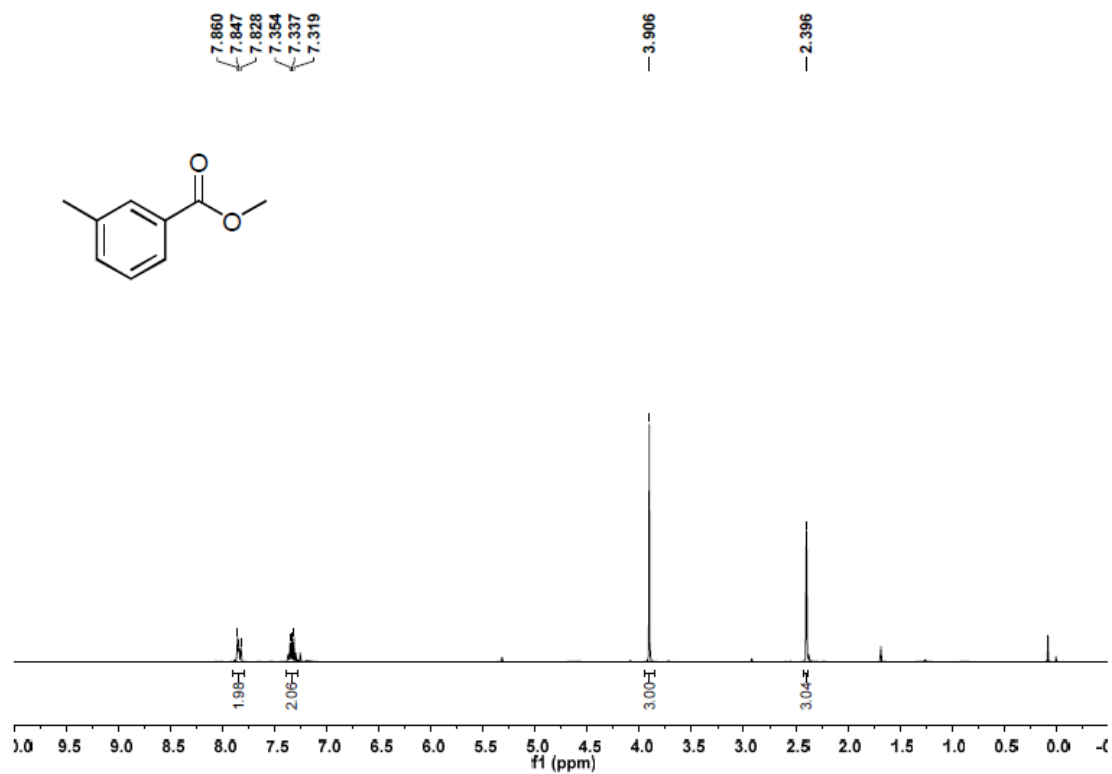

<sup>13</sup>C NMR

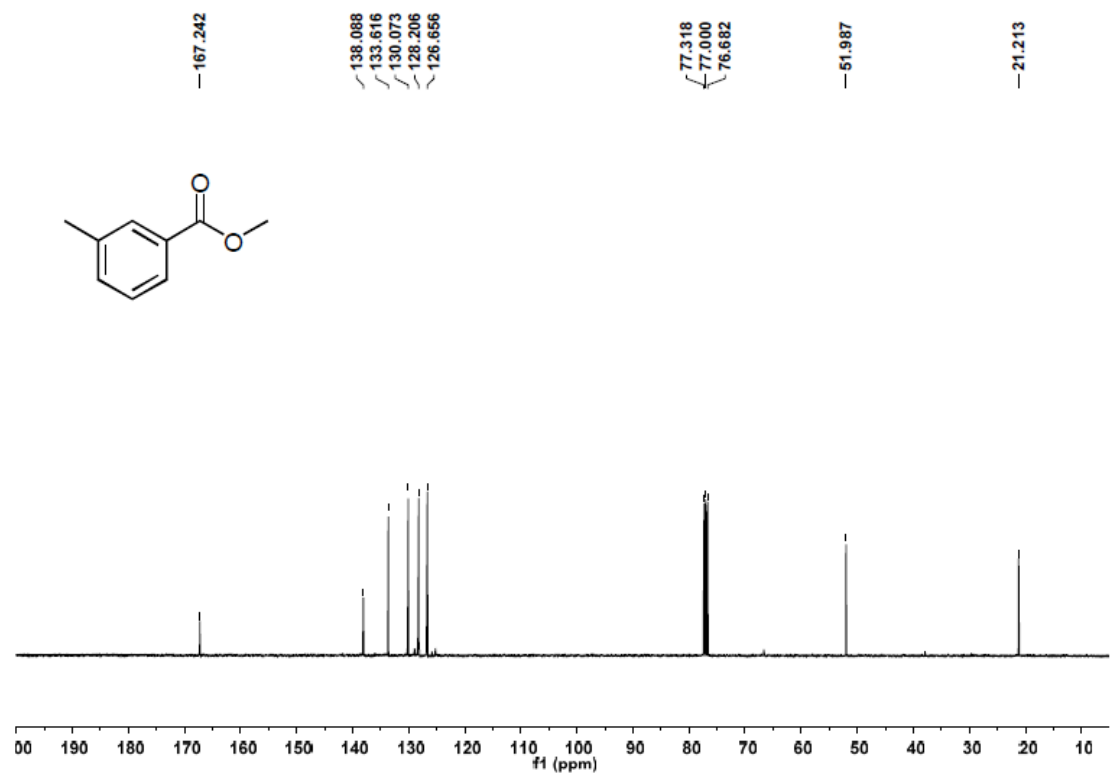

3i

<sup>1</sup>H NMR

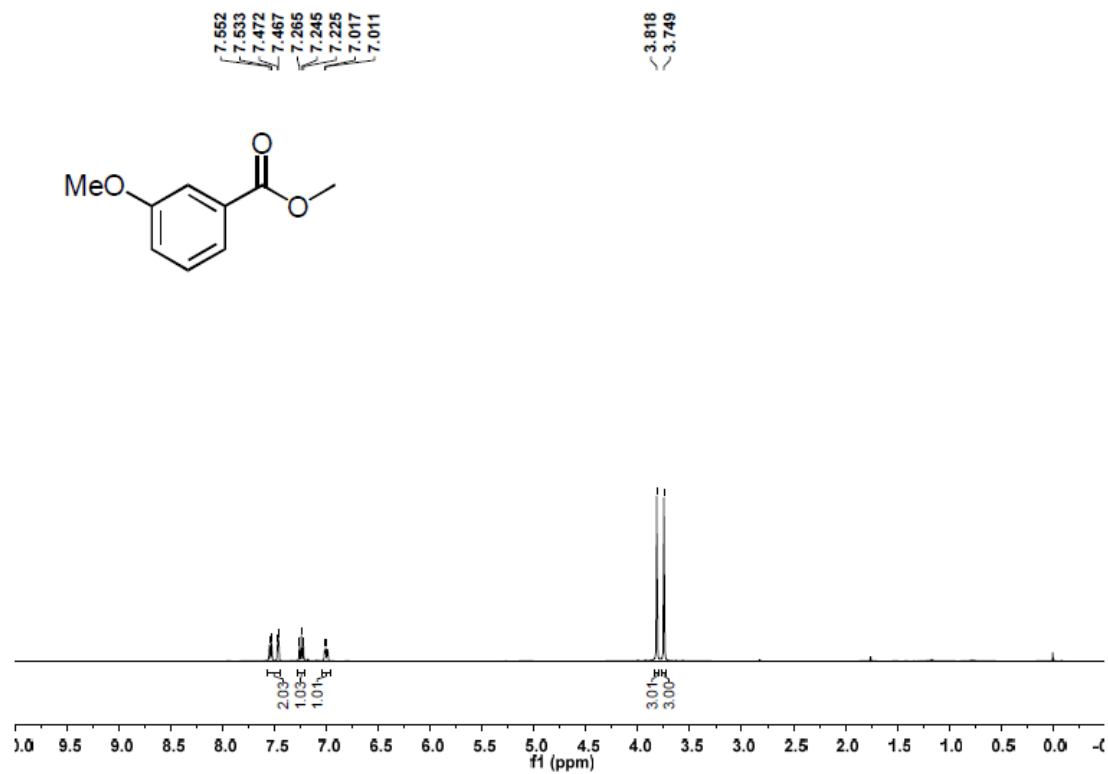

<sup>13</sup>C NMR

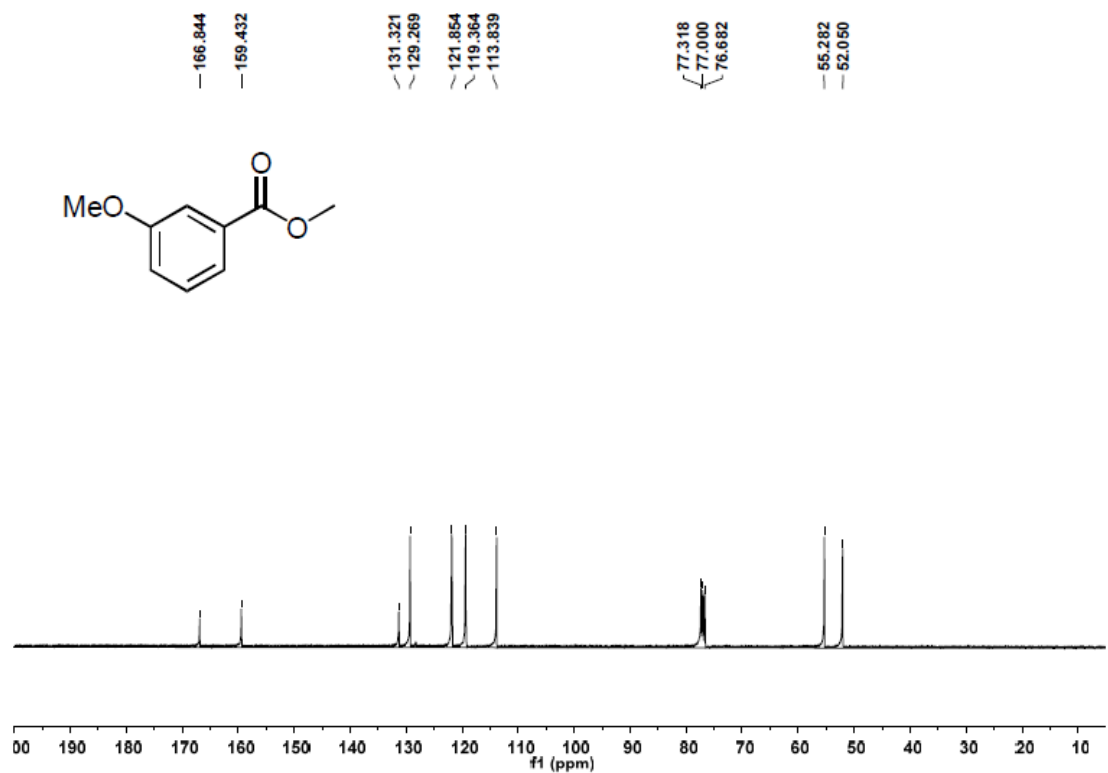

3j

<sup>1</sup>H NMR

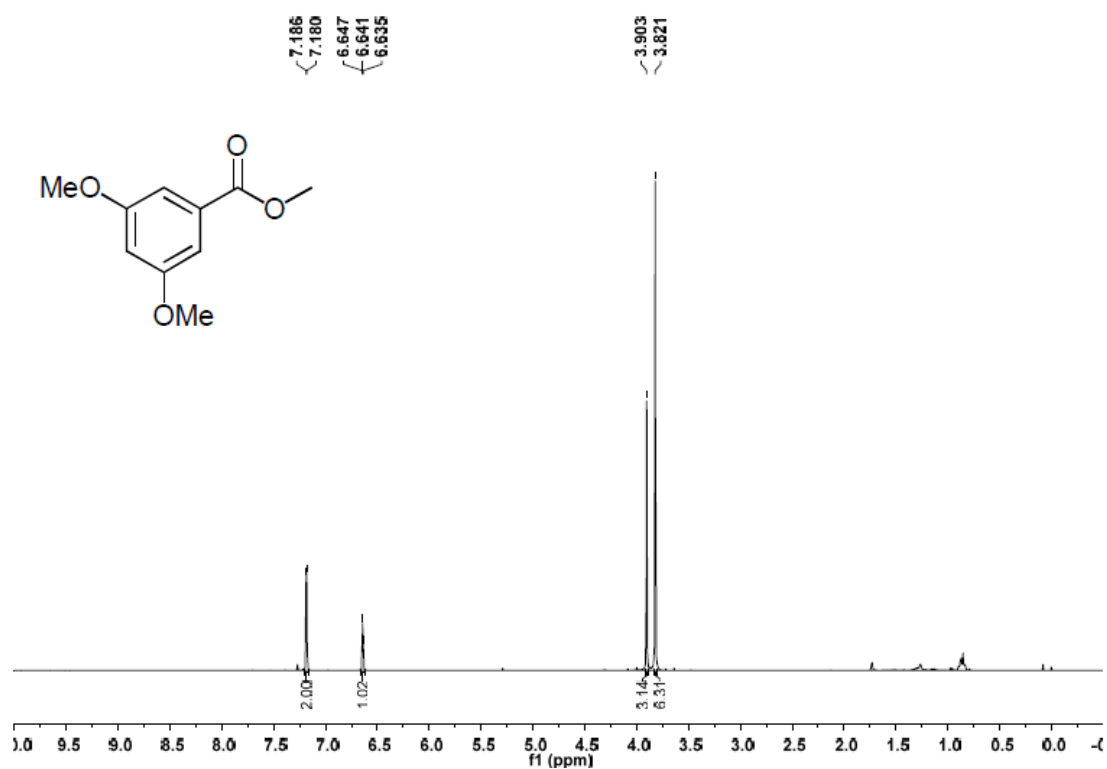

<sup>13</sup>C NMR

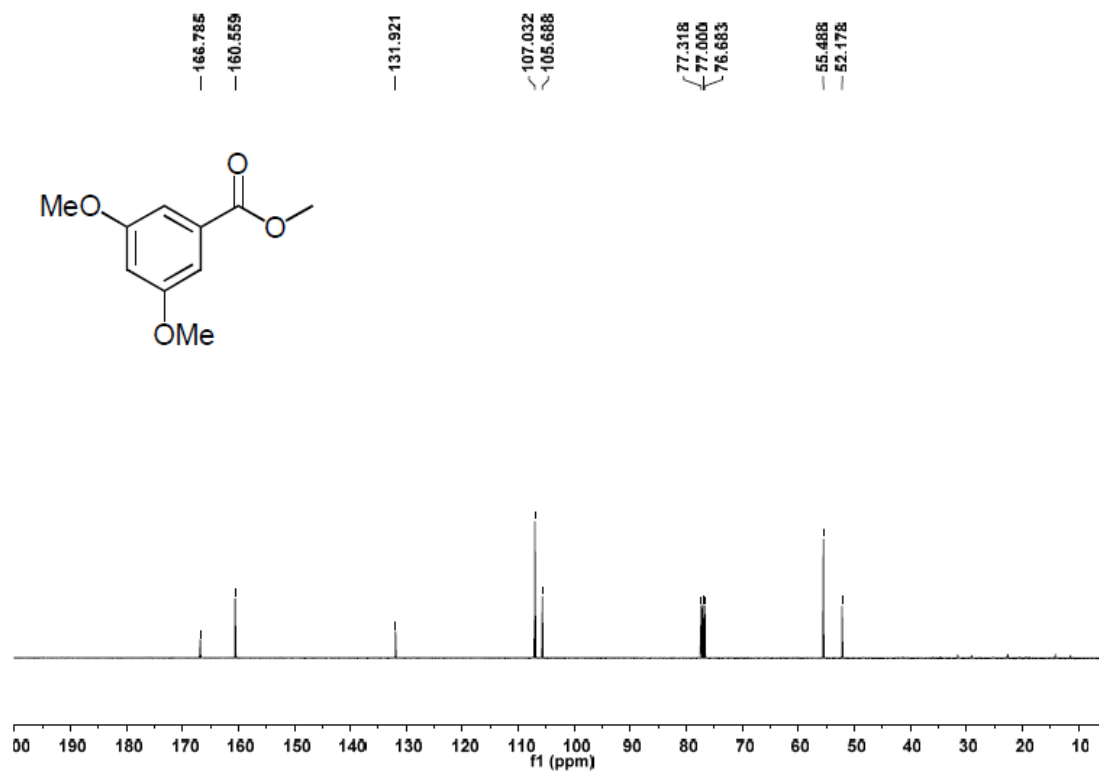

# 3k

## <sup>1</sup>H NMR

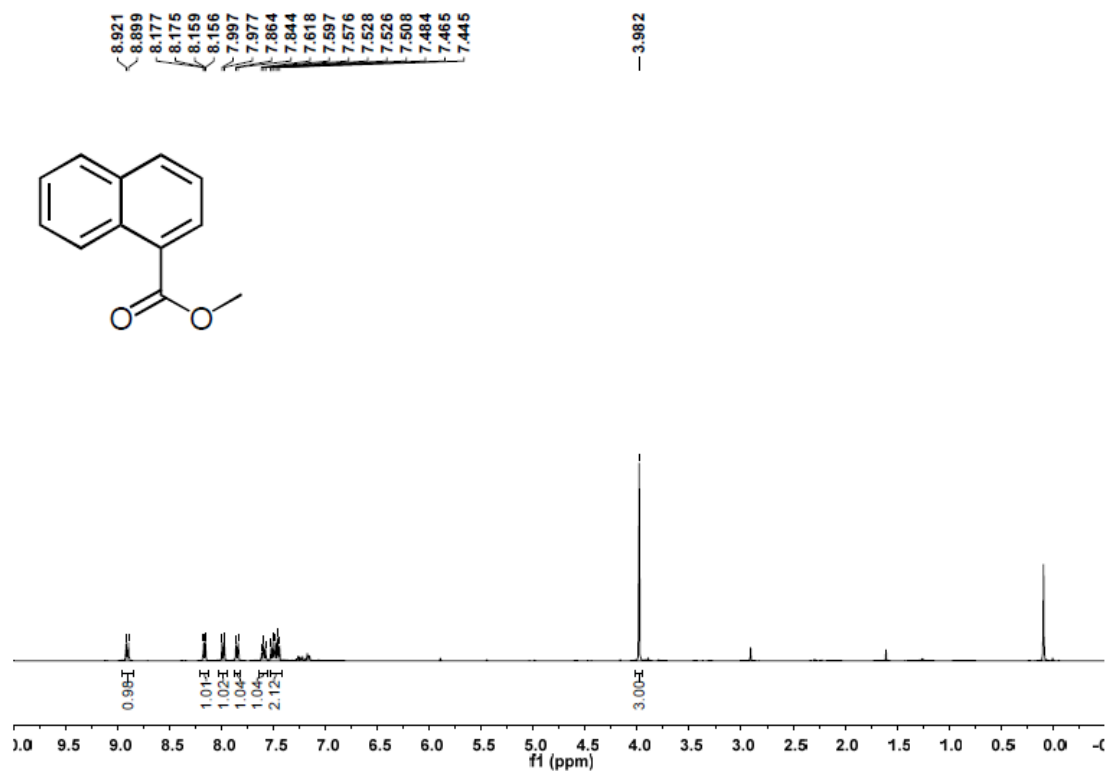

## <sup>13</sup>C NMR

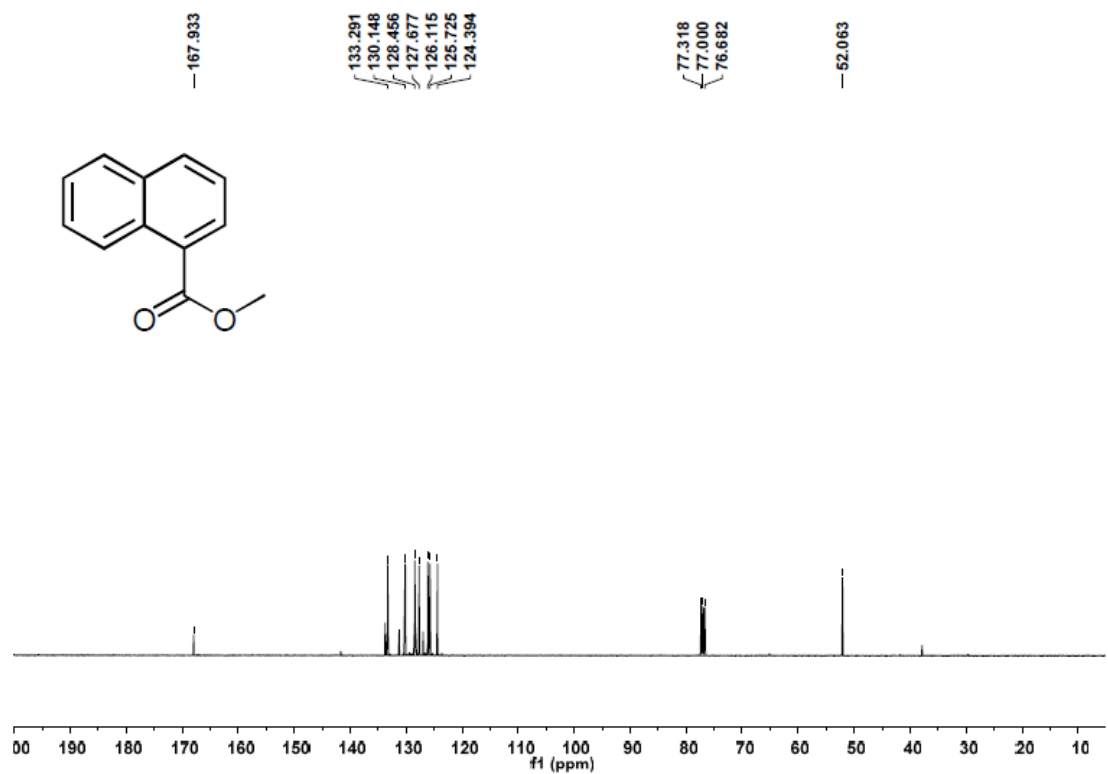

3l

<sup>1</sup>H NMR

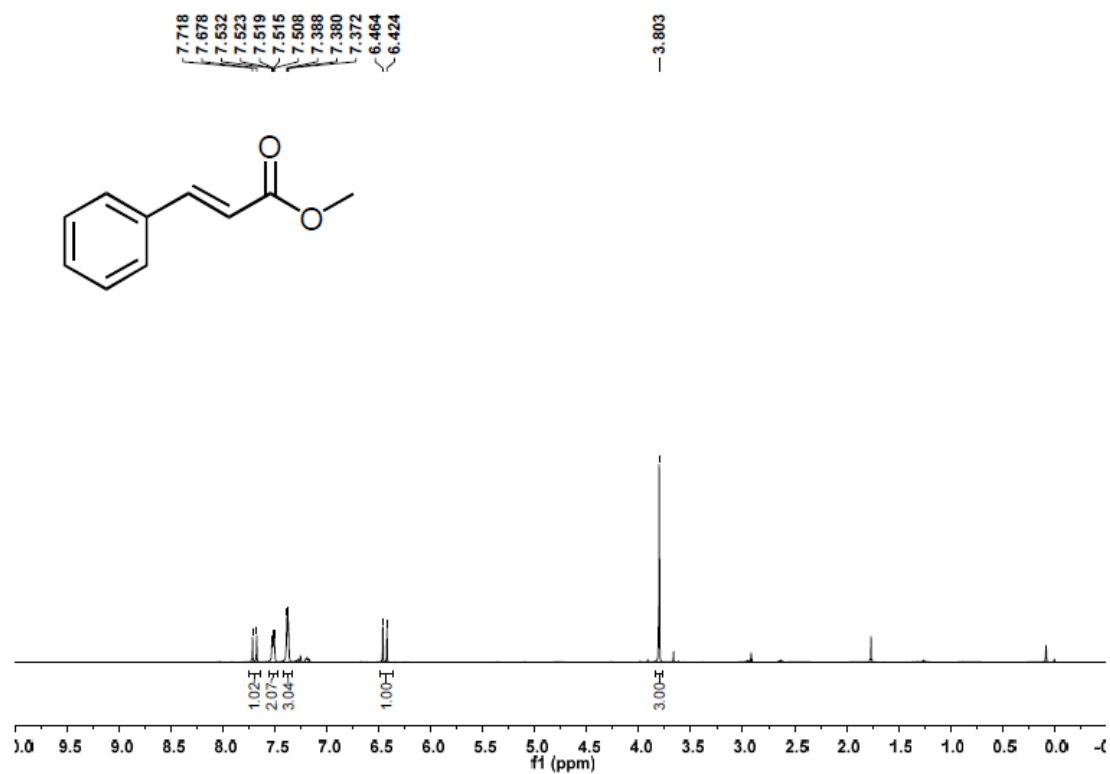

<sup>13</sup>C NMR

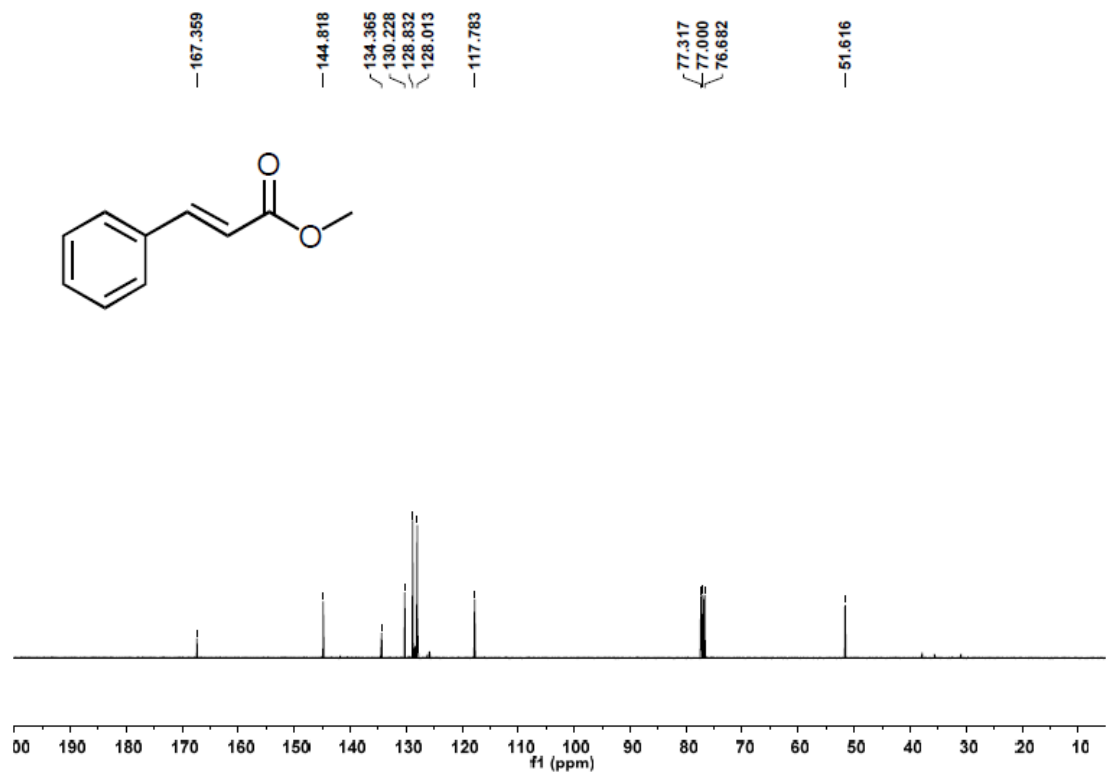

3m

$^1\text{H}$  NMR

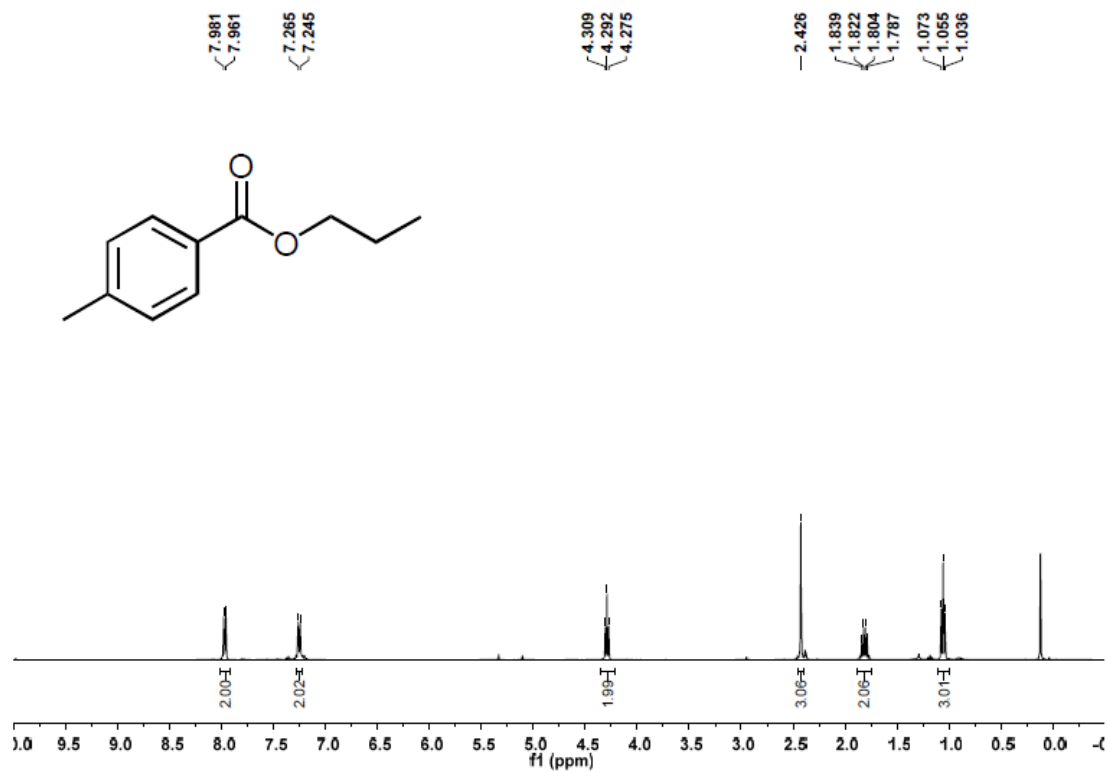

$^{13}\text{C}$  NMR

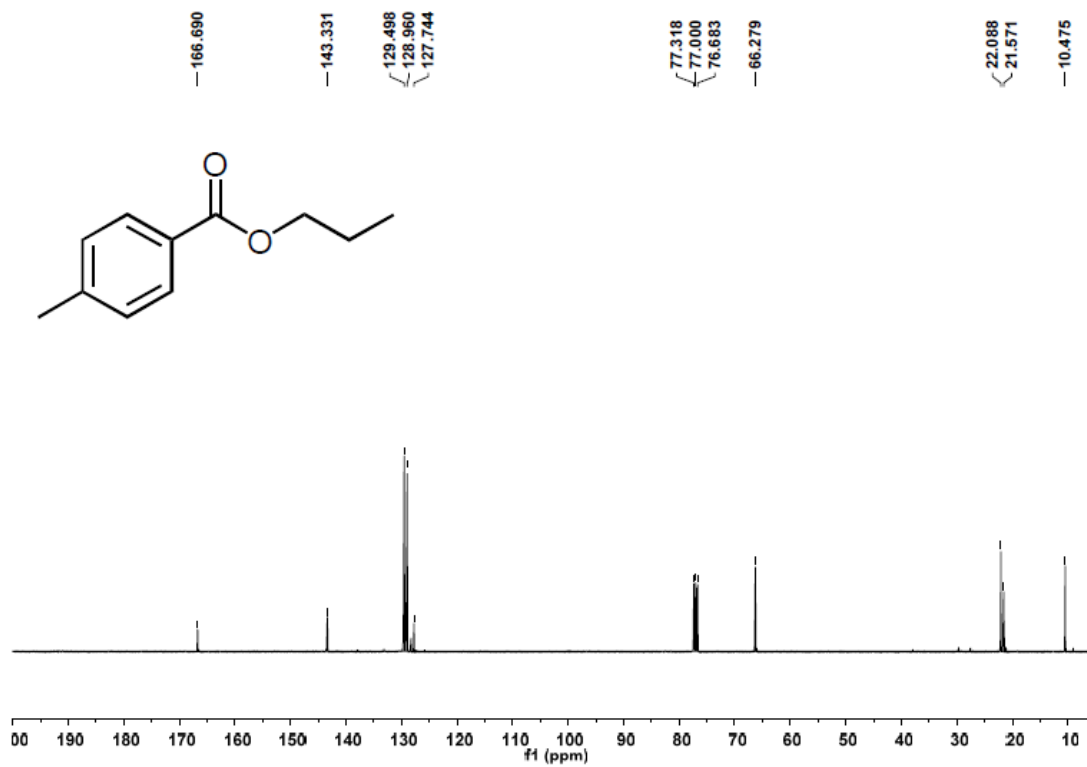

# 3n

## <sup>1</sup>H NMR

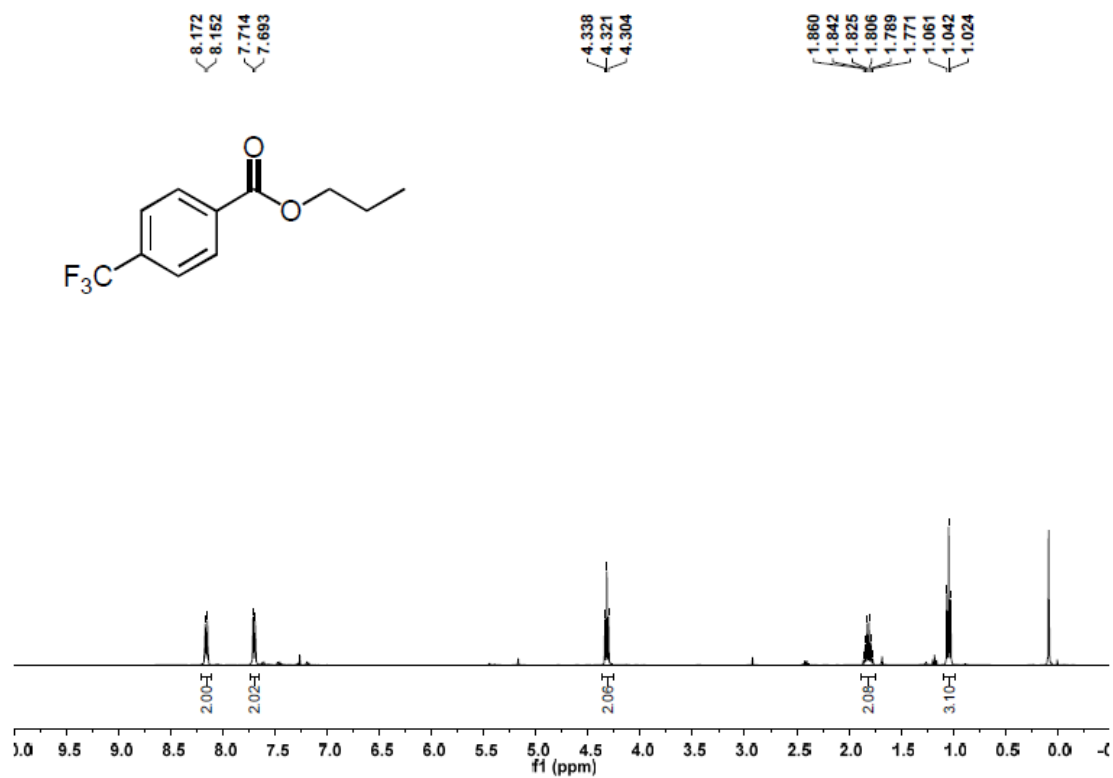

## <sup>13</sup>C NMR

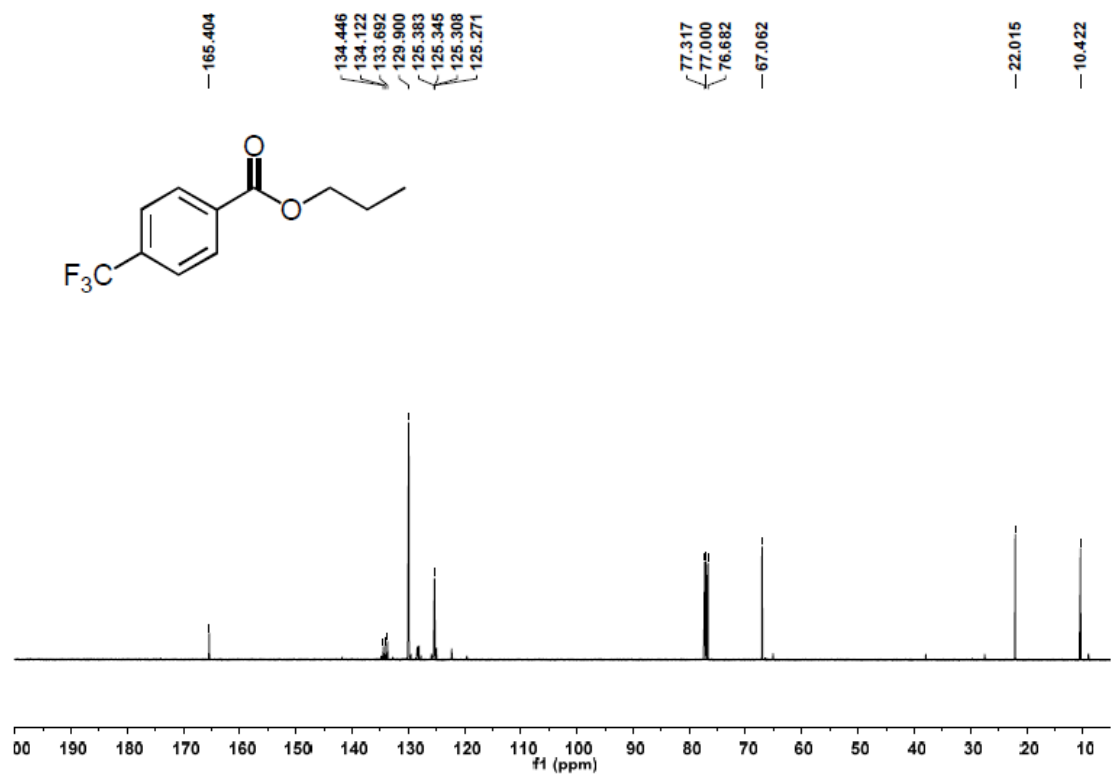

3o

<sup>1</sup>H NMR

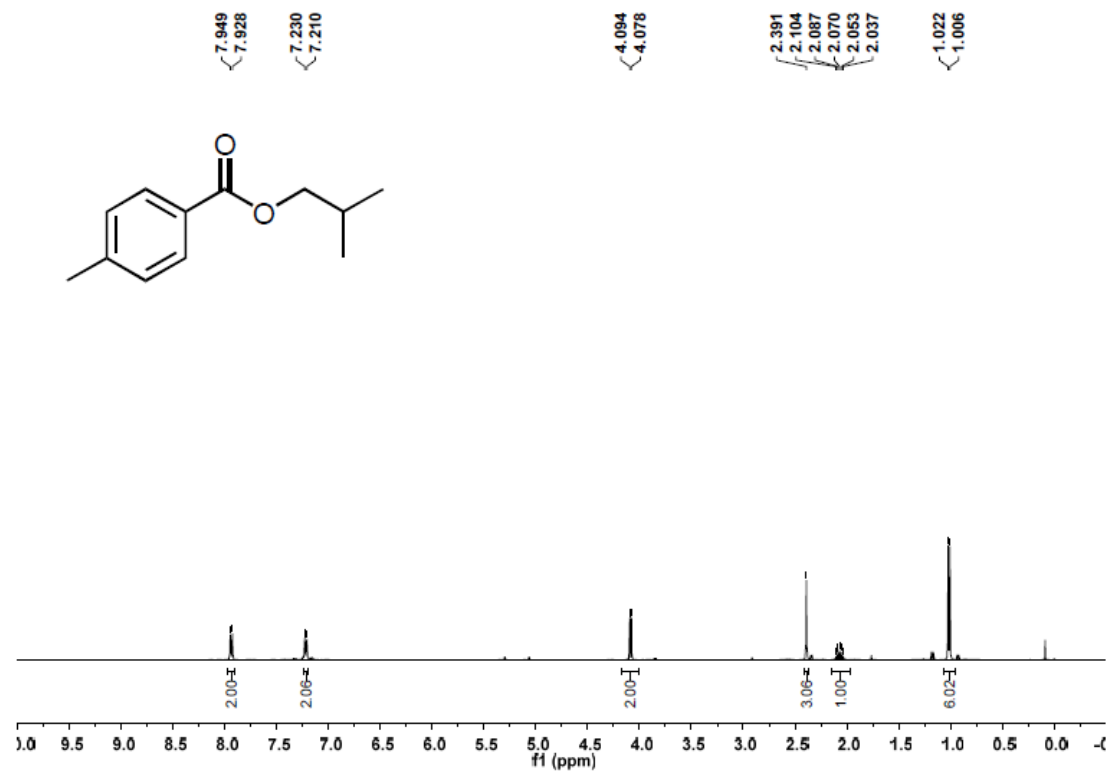

<sup>13</sup>C NMR

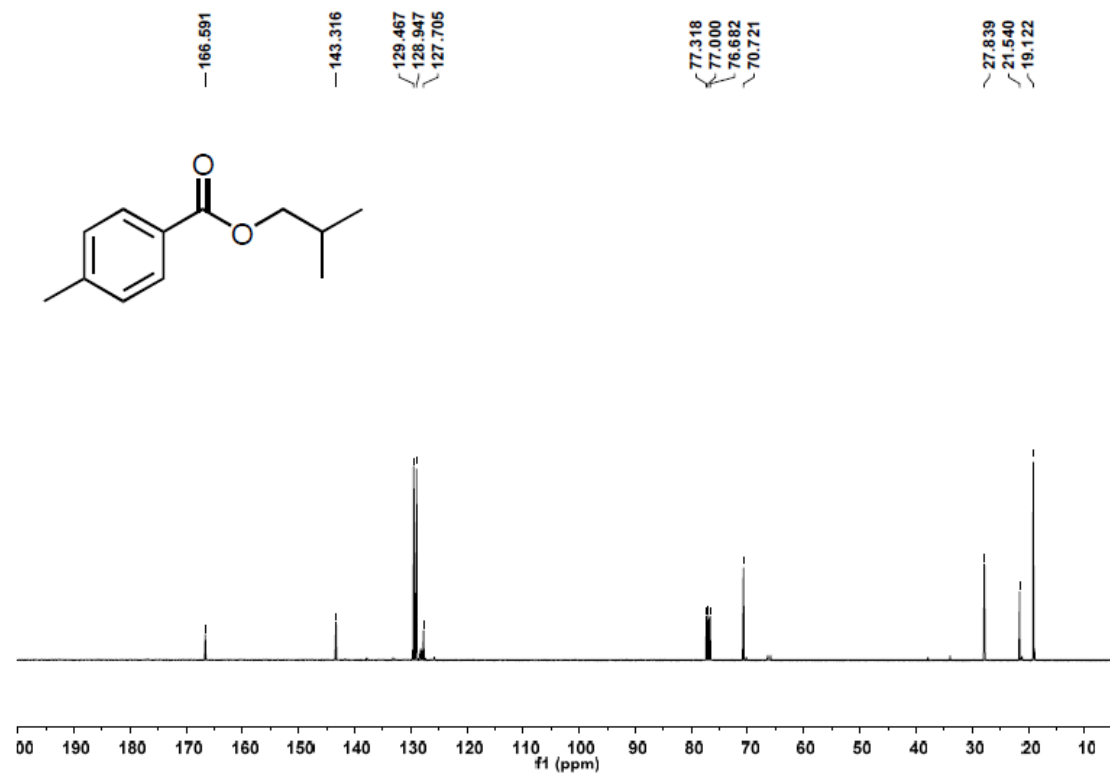

3p

<sup>1</sup>H NMR

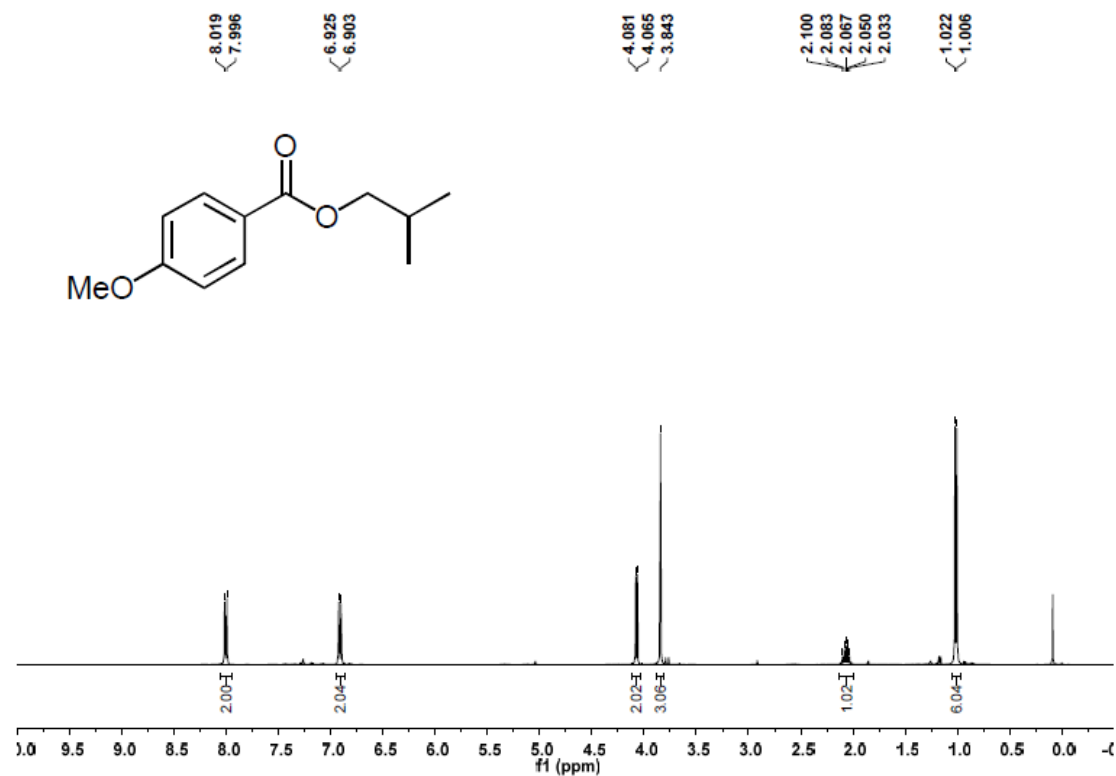

<sup>13</sup>C NMR

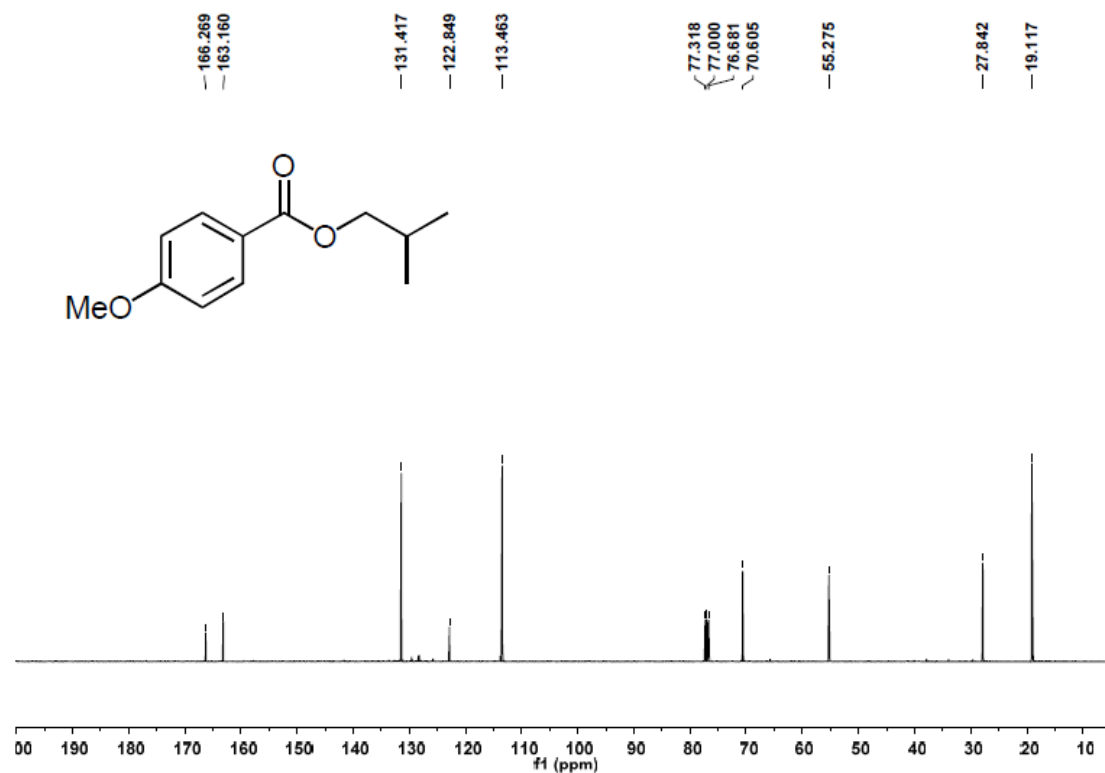

Supplement: c5ob00677e1.pdf [file c5ob00677e1.pdf]
